1 **Category:** Letter

2

3 **West Nile virus detection in horses in three Brazilian states.**

4

5 Erica Azevedo Costa<sup>1^</sup>, Marta Giovanetti<sup>2,3^</sup>, Lilian Silva Catenacci<sup>4^</sup>, Vagner  
6 Fonseca<sup>3,5,6^</sup>, Flavia Aburjaile<sup>2,3^</sup>, Felipe Melo Campos Iani<sup>7</sup>, Marcelo Adriano da  
7 Cunha e Silva Vieira<sup>8</sup>, Danielle Freitas Henriques<sup>9</sup>, Daniele Barbosa de Almeida<sup>9</sup>,  
8 Maria Isabel Maldonado Coelho Guedes<sup>1</sup>, Beatriz Senra Álvares da Silva Ramos<sup>1</sup>,  
9 Aila Solimar Gonçalves Silva<sup>1</sup>, Tulio de Oliveira<sup>5</sup>, Karina Ribeiro Leite Jardim  
10 Cavalcante<sup>10</sup>, Noely Fabiana Oliveira de Moura<sup>10</sup>, Alessandro Pecego Martins  
11 Romano<sup>10</sup>, Carlos F. Campelo de Albuquerque<sup>11</sup>, Lauro César Soares Feitosa<sup>12</sup>,  
12 José Joffre Martins Bayeux<sup>13</sup>, Raffaella Bertoni Cavalcanti Teixeira<sup>14</sup>, Osmaikon  
13 Lisboa Lobato<sup>15</sup>, Silvokleio da Costa Silva<sup>15</sup>, José Lourenço<sup>16</sup>, Luiz Carlos Junior  
14 Alcantara<sup>2,3\*</sup>.

15

16 **Authors Affiliations**

17 <sup>1</sup>Departamento de Medicina Veterinária Preventiva, Escola de Veterinária,  
18 Universidade Federal de Minas Gerais, Belo Horizonte, Minas Gerais, Brazil;

19 <sup>2</sup>Laboratório de Flavivírus, Instituto Oswaldo Cruz, Fundação Oswaldo Cruz, Rio de  
20 Janeiro, Brazil; <sup>3</sup>Laboratório de Genética Celular e Molecular, Universidade Federal

21 de Minas Gerais, Belo Horizonte, Minas Gerais, Brazil; <sup>4</sup>Departamento De  
22 Morfofisiologia Veterinária, Universidade Federal do Piauí; <sup>5</sup>KwaZulu-Natal

23 Research Innovation and Sequencing Platform (KRISP), School of Laboratory  
24 Medicine and Medical Sciences, College of Health Sciences, University of KwaZulu-

25 Natal, Durban, South Africa; <sup>6</sup>Coordenação Geral dos Laboratórios de Saúde

26 Pública/Secretaria de Vigilância em Saúde, Ministério da Saúde, (CGLAB/SVS-MS)  
27 Brasília, Distrito Federal 70719-040, Brazil; <sup>7</sup>Laboratório Central de Saúde Pública,  
28 Fundação Ezequiel Dias, Belo Horizonte, Brazil; <sup>8</sup>Piauí State Health Department,  
29 Terezina, Brazil;  
30 <sup>9</sup>Seção de Arbovirologia e Febres Hemorrágicas, Instituto Evandro Chagas,  
31 Ministério da Saúde; <sup>10</sup>Coordenação Geral das Arboviroses, Secretaria de Vigilância  
32 em Saúde/Ministério da Saúde, Brasília, Distrito Federal, Brazil; <sup>11</sup>Organização Pan-  
33 Americana da Saúde/Organização Mundial da Saúde, Brasília-DF, Brazil;  
34 <sup>12</sup>Departamento de Clínica e Cirurgia Veterinária, Centro de Ciências Agrárias,  
35 Universidade Federal do Piauí, Teresina, Piauí, Brazil; <sup>13</sup>UNIVAP- Universidade Vale  
36 do Paraíba, Faculdade de Ciências da Saúde, Medicina Veterinária, Urbanova, São  
37 José Dos Campos, SP; <sup>14</sup>Departamento de Clínica e Cirurgia Veterinárias, Escola de  
38 Veterinária, Universidade Federal de Minas Gerais, Belo Horizonte, Minas Gerais,  
39 Brazil; <sup>15</sup>Laboratório de Genética e Conservação de Germoplasma, Campus Prof.<sup>a</sup>  
40 Cinobelina Elvas, Universidade Federal do Piauí, Bom Jesus, Piauí, Brazil;  
41 <sup>16</sup>Department of Zoology, University of Oxford, Oxford OX1 3PS, UK.

42

43 **Keywords:** West Nile virus, genomic monitoring, molecular detection, Brazil

44

45 ^Denotes equal contribution

46

47 \* **Correspondence should be addressed to:** [luiz.alcantara@ioc.fiocruz.br](mailto:luiz.alcantara@ioc.fiocruz.br)

48

49

50

51

52 **Abstract**

53 We report genetic evidence of WNV circulation from southern and northeastern  
54 Brazilian states isolated from equine red blood cells. In the northeastern state the  
55 tenth human case was also detected, presenting neuroinvasive disease compatible  
56 with WNV infection. Our analyses demonstrate that much is still unknown on the  
57 virus' local epidemiology. We advocate for a shift to active surveillance, to ensure  
58 adequate control for future epidemics with spill-over potential to humans.

59

60 **Text**

61 West Nile virus (WNV), a member of the *Flaviviridae* family, was first identified in the  
62 West Nile district of Uganda in 1937, but is nowadays commonly found in Africa,  
63 Europe, North America, the Middle East, and Asia [1-3].

64

65 WNV transmission is maintained in a mosquito-bird cycle, for which the genus *Culex*,  
66 in particular *Cx. pipiens*, are considered the principal vectors [4]. WNV can infect  
67 humans, equines and other mammals, but these are considered “dead-end” hosts,  
68 given their weak potential to function as amplifying hosts to spread infection onwards  
69 [5, 6]. Around 80% of WNV infections in humans are asymptomatic while the rest  
70 may develop mild or severe disease. Mild disease includes fever, headache,  
71 tiredness and vomiting [7, 8], while severe disease (neuroinvasive) is characterized  
72 by high fever, coma, convulsions and paralysis [7, 8]. Equine infections can  
73 occasionally cause neurological disease and death [7, 8], such that equines typically  
74 serve as sentinel species for WNV outbreaks with potential for spill-over into human  
75 populations.

76

77 Genome detection of WNV in South America were originally reported in horses  
78 (Argentina in 2006) and captive flamingos (Colombia, in 2012) [9, 10]. The first ever  
79 sequenced genome in Brazil was in 2019, when the virus was isolated from a horse  
80 sicked with severe neurological disease in the Espírito Santo state [11]. Despite  
81 multiple studies reporting serological evidence suggestive of WNV circulation in  
82 Brazil [11-13] and reports human WNV disease confirmed cases in the Piauí state  
83 [13], much is unknown about genomic diversity, evolution and transmission  
84 dynamics across the country.

85

86 Here, we report genetic evidence of WNV circulation in three Brazilian states  
87 extracted from equine red blood cells (RBCs) with neurological or ophthalmic  
88 disease and use a computational approach to explore the theoretical transmission  
89 potential of WNV within one of those states.

90

91 Samples (RBCs) from three horses with suspected WNV infection obtained from  
92 southern (Minas Gerais and São Paulo) and northeastern (Piauí) Brazilian states  
93 were sent for molecular diagnosis at the *Departamento de Medicina Veterinária*  
94 *Preventiva* at the Federal University of Minas Gerais (UFMG) (**for details see**  
95 **Appendix**).

96

97 RNAs were extracted from red blood cells and tested using an in-house PCR assay  
98 (**see Technical Appendix for details**). WNV-specific RT-PCR amplification  
99 products were obtained using a combination of nested and multiplex PCR scheme  
100 (**Figure 1 panel A, B**) (**see Technical Appendix for details**). A multiplex PCR

101 primer scheme was then designed (**Appendix Table S1**) to generate complete  
102 genomes sequences by means of portable nanopore sequencing. The published  
103 WNV genome from Brazil (MH643887) was used to generate a mean 98.4%  
104 consensus sequences that formed the target for primer design. New genomes were  
105 deposited in the GenBank with accession numbers MW420987, MW420988 and  
106 MW420989 (**Table 1**).

107 We constructed phylogenetic trees to explore the relationship of the sequenced  
108 genomes to those from elsewhere globally. We retrieved 2321 WNV genome  
109 sequences with associated lineage date and country of collection from GenBank,  
110 from which we generated a subset that included the highly supported (>0.9) clade  
111 containing the newly WNV strains obtained in this study plus 29 sequences  
112 (randomly sampled) from all lineages and performed phylogenetic analysis (**see**  
113 **Technical Appendix for detail**). An automated online phylogenetic tool to identify  
114 and classify WNV sequences was developed (available at  
115 [http://krisp.ukzn.ac.za/app/typingtool/wnv/job/9b40f631-51c4-419c-9edf-](http://krisp.ukzn.ac.za/app/typingtool/wnv/job/9b40f631-51c4-419c-9edf-2206e7cd8d9c/interactive-tree/phylo-WNV.xml)  
116 [2206e7cd8d9c/interactive-tree/phylo-WNV.xml](http://krisp.ukzn.ac.za/app/typingtool/wnv/job/9b40f631-51c4-419c-9edf-2206e7cd8d9c/interactive-tree/phylo-WNV.xml)).

117

118 Phylogenies estimated by the newly developed WNV typing tool, along with  
119 maximum likelihood methods (**Figure 1 panel C**), consistently placed the Brazilian  
120 genomes in a single clade within the 1a lineage with maximum statistical support  
121 (bootstrap = 100%) (**Supplementary Figure 1**).

122

123 Time-resolved maximum likelihood tree appeared to be consistent with previous  
124 estimates [11] and showed that the new genomes clustered with strong bootstrap  
125 support (97%) with a WNV strain isolated from an *Aedes albopictus* mosquito in

126 Washington DC, USA in 2019 (**Figure 1 panel D**). Interestingly, these new isolates  
127 did not group with the previously sequenced genome in 2019 from the Espirito Santo  
128 state, suggesting that inter-continental introduction events might be frequent in  
129 Brazil.

130 We also explored the dynamics of suspected human WNV cases (**see Technical**  
131 **Appendix for detail**) in the three Brazilian states for which we had sequence data.  
132 Between late 2015 and early 2020, all states had suspected cases, suggesting  
133 continuous circulation or recent importation from other regions of the country or  
134 elsewhere. The state of Piau  presented sufficient reports (N=116) for an exploration  
135 of the geo-temporal dynamics of WNV spread (**Figure 2A**), while the other two  
136 states had a much smaller number of total reports (N=3 for MG, 18 for SP).

137

138 To estimate the transmission potential of WNV we calculated the index P, a  
139 computational approach informed by climatic variables from Louren o et al. recently  
140 applied in Israel [14] (**see Technical Appendix for detail**). In the 2015-2016  
141 season, cases in Piau  presented a seasonal signal typical of WNV and other  
142 mosquito-borne viruses, with a peak between February and May (late summer and  
143 autumn). We compared suspected cases per month to the monthly mean  
144 transmission potential across the state (**Figure 2B**). The Spearman's correlation  
145 between the two variables was 0.66 (p-value 0.01). This correlation was smaller than  
146 previously reported for Israel (>0.9), likely resulting from the suspected nature of the  
147 Brazilian cases, or from averaging climatic variables (and thus the index P) across  
148 the vast spatial dimension of the state.

149

150 We also estimated the index P in space for this season, which highlighted some geo-  
151 patterns (**Figures 2C-F**). In summer, when reports were high, estimated  
152 transmission potential was mainly highest in the center at the -43 longitude axis  
153 (**Figure 2C**). Into autumn, the southern region was the first with lower transmission  
154 potential (**Figure 2D**), followed by the northern region in the winter (**Figure 2E**). In  
155 spring, coinciding with the trough of reporting, the lowest transmission potential was  
156 estimated in the same central region presenting highest potential in the summer and  
157 autumn (**Figure 2F**). These geo-temporal snapshots highlight a possible wave of  
158 seasonal transmission potential, starting in the south-west in spring (**Figure 2F**),  
159 moving to the north-east in summer (**Figure 2C**), and ending in the north during  
160 autumn (**Figure 2D**).

161

## 162 **Conclusions**

163 Our analyses indicate that additional data is required to better identify routes of WNV  
164 importation into Brazil, and to understand its local transmission dynamics. Critically,  
165 it is still uncertain where in the country WNV is endemic. Indeed, if under reporting is  
166 frequent, the data presented in this article is compatible with both sporadic or  
167 endemic local transmission. Furthermore, the detection of WNV RNA from equine  
168 whole blood presented in this study proved to be an effective diagnostic method in  
169 horses. Shifting from passive to active WNV screening and sequencing in equines  
170 and birds in Brazil must be implemented to better understand the virus' local  
171 epidemiology, and to be able to act accordingly to prevent any future epidemics with  
172 significant spill-over to humans.

173

## 174 **Acknowledgements**

175 The authors thank the important contributions of the Municipal and Piauí State  
176 Health Department (SESAPI, FMS), Municipal and Piauí State Animal Health  
177 Department (ADAPI), Laboratório de Saúde Pública do Piauí (LACEN-PI) and the  
178 colleague Thiago dos Santos Silva. We also thank the sponsoring institutions: Saint  
179 Louis Zoo WildCare Institute and Institute for Conservation Medicine (USA),  
180 Universidade Federal do Piauí (UFPI), Fundação de Amparo a Pesquisa do Estado  
181 do Piauí (FAPEPI). Authors also thank the Municipal and State Health Department of  
182 São Paulo and Minas Gerais state.

183

#### 184 **Declaration of interests**

185 The authors declare no competing interests.

186

#### 187 **Data Sharing**

188 Newly generated WNV sequences have been deposited in GenBank under  
189 accession numbers MW420987, MW420988 and MW420989.

190

#### 191 **Financial Disclosure**

192 This work was supported by Decit/SCTIE/BrMoH/CNPq (440685/2016-8), by CAPES  
193 (88887.130716/2016-00) and by the European Union's Horizon 2020 Research and  
194 Innovation Programme under ZIKAlliance Grant Agreement no. 734548. MG and  
195 LCJA is supported by Fundação de Amparo à Pesquisa do Estado do Rio de Janeiro  
196 (FAPERJ). JL is supported by a lectureship from the Department of Zoology,  
197 University of Oxford.

198

#### 199 **References**



- 200 [1] Fall G, Di Paola N, Faye M, et al. Biological and phylogenetic characteristics of  
201 West African lineages of West Nile virus (DWC Beasley, Ed.). *PLoS Negl Trop Dis*.  
202 2017;11: 1-23.
- 203 [2] Smithburn KC, Hughes TP, Burke AW, et al. A neurotropic virus isolated from the  
204 blood of a native of Uganda. *Am J Trop Med Hyg*. 1940; 20: 471-2.
- 205 [3] Murgue B, Zeller H, Deubel V. The ecology and epidemiology of West Nile virus  
206 in Africa, Europe and Asia. *Curr Top Microbiol Immunol*. 2002;267:195-221.
- 207 [4] Campbell GL, Marfin AA, Lanciotti RS, et al. West Nile virus. *Lancet Infect Dis*.  
208 2002;2:519-29.
- 209 [5] Gamino V, Hofle U. Pathology and tissue tropism of natural West Nile virus  
210 infection in birds: a review. *Vet Res*. 2013;44:46-89.
- 211 [6] Bunning ML, Bowen RA, Cropp CB, et al. Experimental infection of horses with  
212 West Nile virus. *Emerg Infect Dis*. 2002;8:380-6.
- 213 [7] Hayes EB, Sejvar JJ, Zaki SR, et al. Virology, pathology, and clinical  
214 manifestations of West Nile virus disease. *Emerg Infect Dis*. 2005;11:1174–1179.
- 215 [8] Kramer LD, Li J, Shi P-Y. West Nile virus. *Lancet Neurol*. 2007;6:171–181.
- 216 [9] Morales MA, Barrandeguy M, Fabbri C, et al. West Nile virus isolation from  
217 equines in Argentina. *Emerg Infect Dis*. 2006;12:1559-61.
- 218 [10] Osorio JE, Ciuoderis KA, Lopera JG, et al. Characterization of West Nile viruses  
219 isolated from captive American flamingoes (*Phoenicopterus ruber*) in Medellin,  
220 Colombia. *Am J Trop Med Hyg*. 2012;87:565-72.
- 221 [11] Martins LC, Silva EVPD, Casseb LMN, et al. First isolation of West Nile virus in  
222 Brazil. *Mem Inst Oswaldo Cruz*. 2019 Jan 17;114:e180332.

223 [12] Pauvolid-Correia A, Morales MA, Levis S, Figueiredo LTM, Couto-Lima D,  
224 Campos Z, et al. Neutralising antibodies for West Nile virus in horses from Brazilian  
225 Pantanal. Mem Inst Oswaldo Cruz. 2011;106:467-74.

226 [13] Vieira MA, Romano APM, Borba AS, et al. West Nile Virus Encephalitis: The  
227 First Human Case Recorded in Brazil. Am J Trop Med Hyg. 2015; 93(2):377-9.

228 [14] Lourenço J, Thompson RN, Thézé J, et al. Characterising West Nile virus  
229 epidemiology in Israel using a transmission suitability index. Euro Surveill. 2020;25:  
230 41.

231

## 232 **Figures legend**

233

### 234 **Figure 1. Investigation of WNV infections in Brazil, between July 2018 - September 2020.**

235 A-B) Agarose gel electrophoresis of amplicons from assay for WNV. A) nested RT-PCR. MW-  
236 Molecular weight marker; 1- plasm of horse from São Paulo; 2- buffy coat of horse from São Paulo; 3-  
237 washed RBC of horse from São Paulo; 4- without sample; 5 and 6-positive control (synthetic gene);  
238 NTC, no template control. (B) Multiplex PCR. MW-Molecular weight marker; 1- horse form Minas  
239 Gerais (pair primers); 2- horse form Minas Gerais (impair primers); 3- horse form Sao Paulo (pair  
240 primers); 4- horse form Sao Paulo (impair primers); 5-horse form Piauí (pair primers); 6-horse form  
241 Piauí (impair primers); NTC, no template control. C) Midpoint rooted maximum-likelihood phylogeny of  
242 WNV genomes, showing major lineages. The scale bar is in units of substitutions per site (s/s).  
243 Support for branching structure is shown by bootstrap values at nodes. D) Time-resolved maximum  
244 likelihood tree showing the WNV strains belonged to the 1a lineage. Colors indicate geographic  
245 location of sampling. The new Brazilian WNV strains are shown in bold.

246

247 **Figure 2 - WNV reporting of suspected cases and estimated transmission potential.** (A) Time  
248 series of suspected human WNV cases in the Brazilian states of Minas Gerais (MG, green), São  
249 Paulo (SP, pink) and Piauí (PI, gold). (B) WNV human suspected cases and estimated monthly mean  
250 transmission potential (index P, grey) for the state of Piauí (gold). The shaded area includes the

251 standard deviation. (C-F) Maps of estimated transmission potential (index P) per geo-location for four  
252 different months in the year of 2016 (from C to F, February, April, October, December respectively).  
253 Color legend on the right applies to all maps. The city of Parnaíba from where the Piauí sequence is  
254 available is marked by a black, full point in the north of the state.

255

A

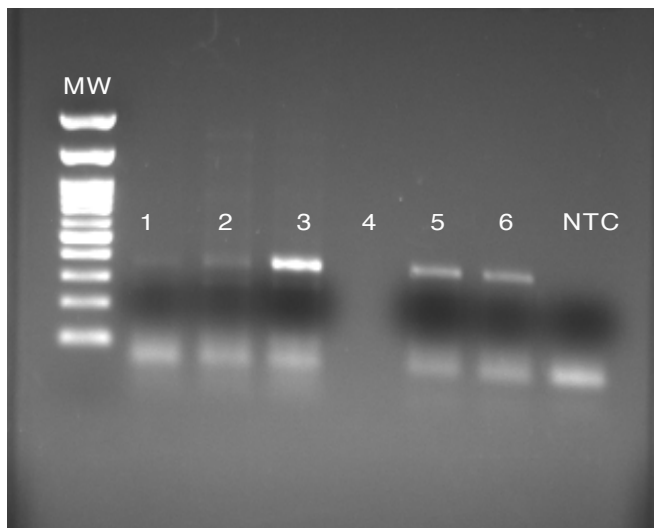

B

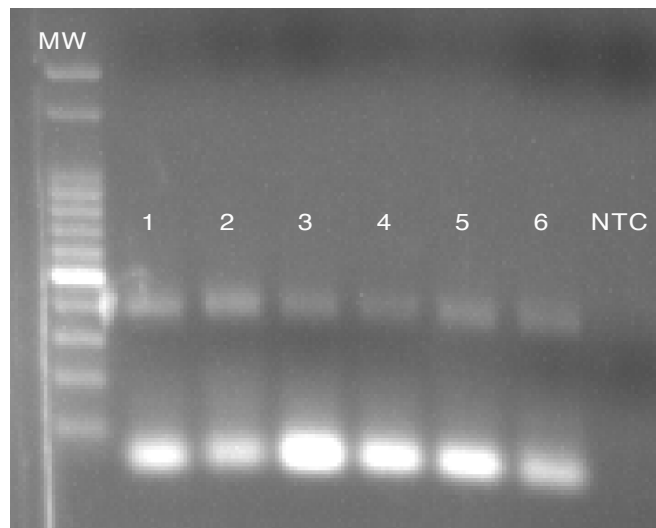

C

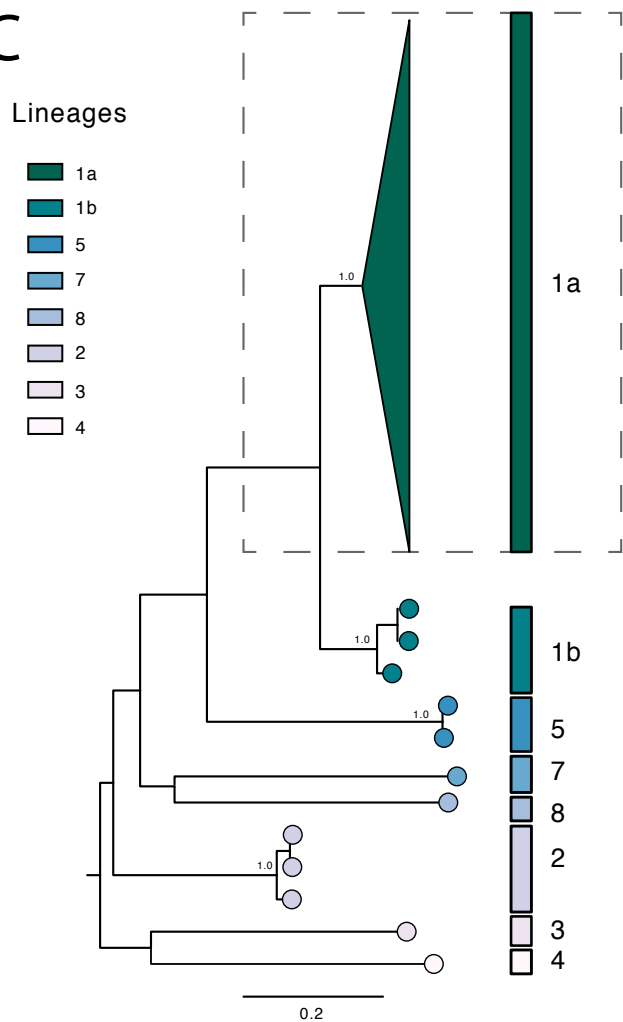

D

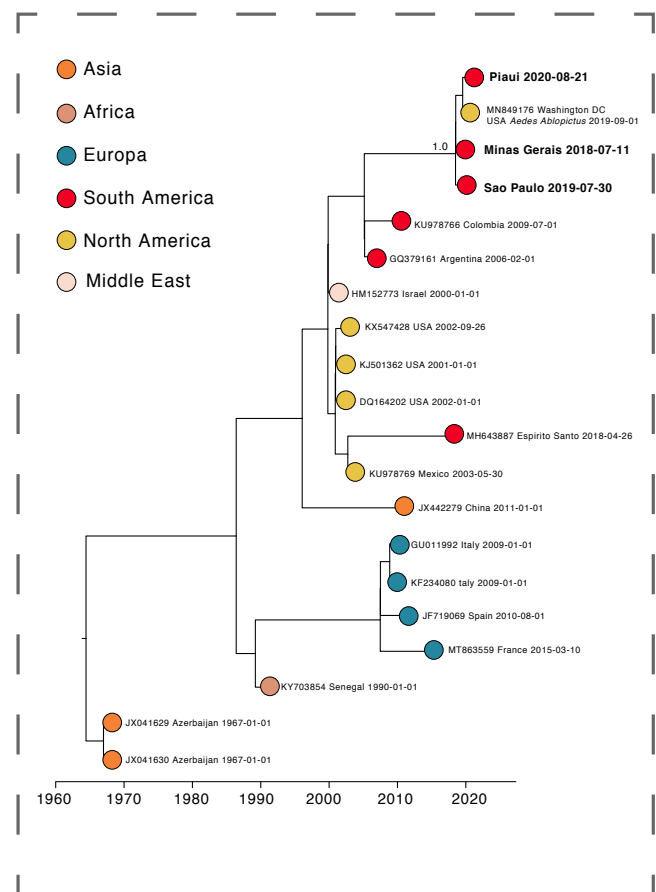

**A** WNV in all states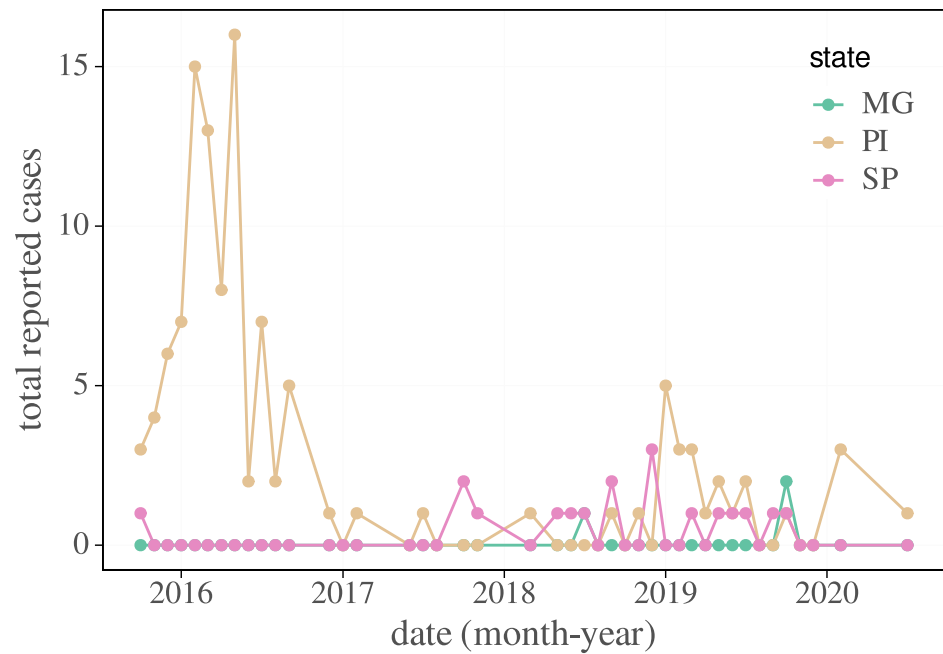**B** WNV and transmission potential in Piauí state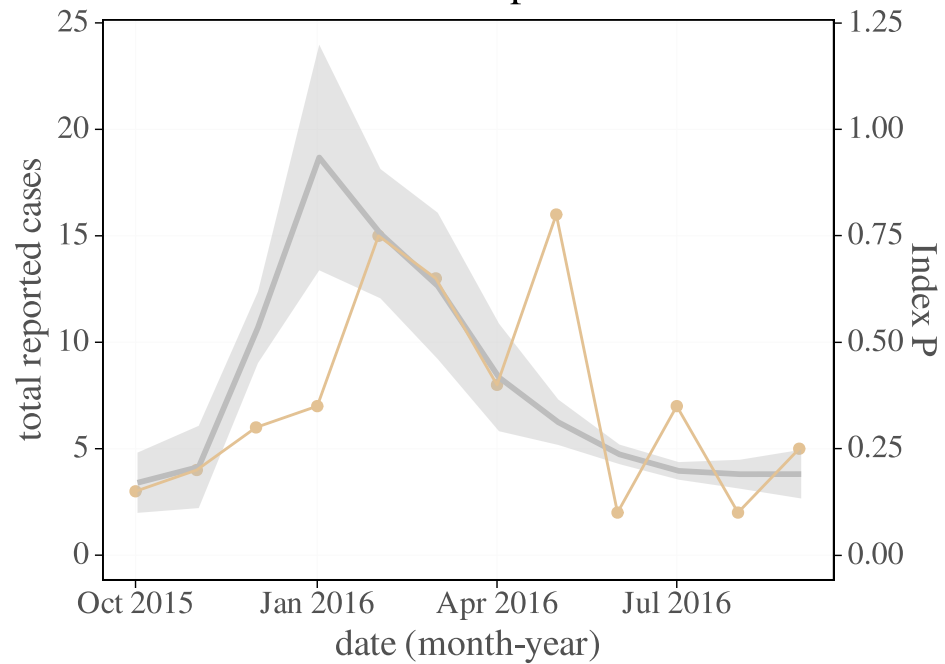**C**

Piauí, Feb. 2016

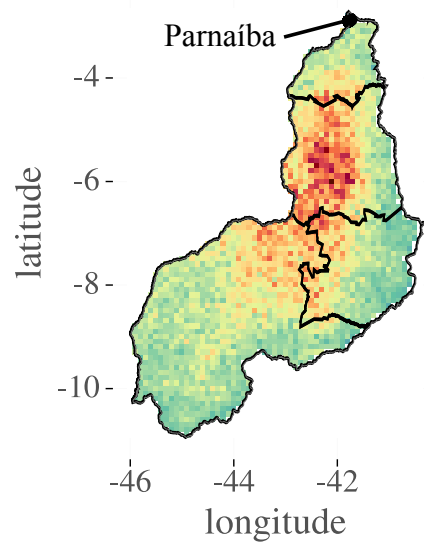**D**

Piauí, Apr. 2016

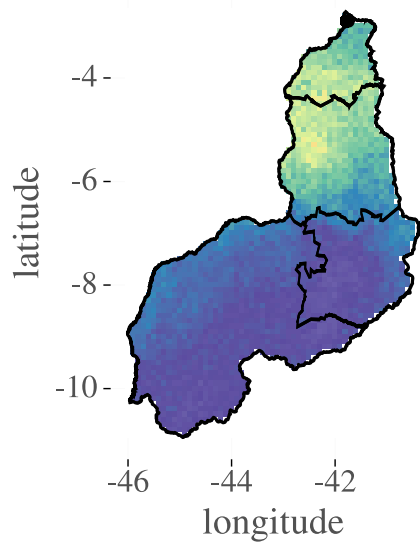**E**

Piauí, Oct. 2016

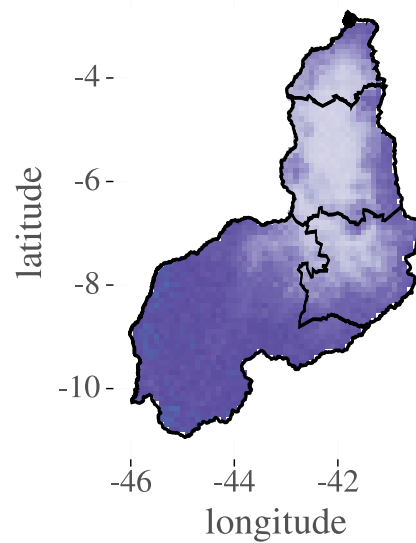**F**

Piauí, Dec. 2016

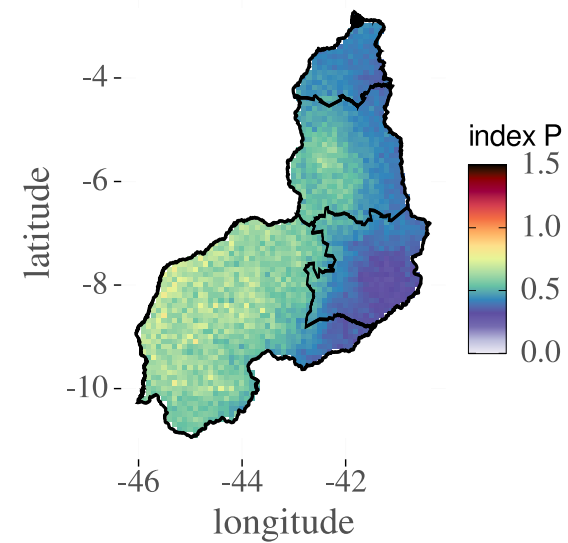

**Table 1.** Epidemiological information and sequencing statistics of the 3 sequenced samples of WNV sampled in Minas Gerais, Sao Paulo, Piaui Brazilian states.

| ID      | Sample | Collection date | Age          | Sex | State | Municipality          | Reads  | Coverage (%) | Depth of coverage | Lineage Assignment | Accession Number | Clinical sign                                          |
|---------|--------|-----------------|--------------|-----|-------|-----------------------|--------|--------------|-------------------|--------------------|------------------|--------------------------------------------------------|
| BC02_07 | RBCs   | 11/07/2018      | 9 months     | F   | MG    | Sabara                | 343743 | 97.9         | 6527.6            | Lineage 1a         | MW420989         | Chorioretinitis                                        |
| BC03_04 | RBCs   | 30/07/2019      | 13 years-old | M   | SP    | São Bernardo do Campo | 170980 | 97.9         | 3189.7            | Lineage 1a         | MW420988         | Muscle stiffness, tremor retinal and flaccid paralysis |
| BC05_06 | RBCs   | 21/08/2020      | 5 years-old  | F   | PI    | Parnaíba              | 222516 | 99.4         | 4121.4            | Lineage 1a         | MW420987         | Neurological complications                             |

ID=study identifier; RBCs=Red Blood Cells; Collection date=Sample collection date; Municipality=Municipality of residence; State= MG-Minas Gerais; SP-Sao Paulo; PI-Piaui; Sex: M=Male; F=Female; Accession Number=NCBI accession number
